# Supplementary material for: The association between RANK, RANKL and OPG gene polymorphisms and the risk of rheumatoid arthritis: a case-controlled study and meta-analysis
Source: PubMed Central journal article supplement (PMC6597846; doi:10.1042/bsr20182356), 2019-06-28
Supplement: bsr20182356_Supp1.pdf [file bsr20182356_Supp1.pdf]

Begg's funnel plot with pseudo 95% confidence limits

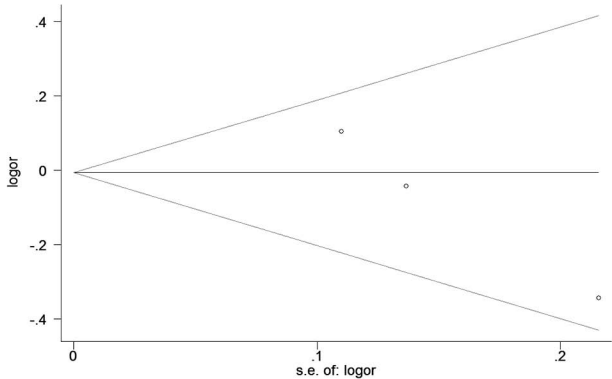

Study %

ID OR (95% CI) Weight

Xu2014 1.19 (0.54, 2.61) 50.38

Assmann2010 2.44 (1.23, 4.86) 49.62

Overall (I-squared = 45.1%, p = 0.177) 1.81 (1.09, 3.02) 100.00

.206

1

4.86

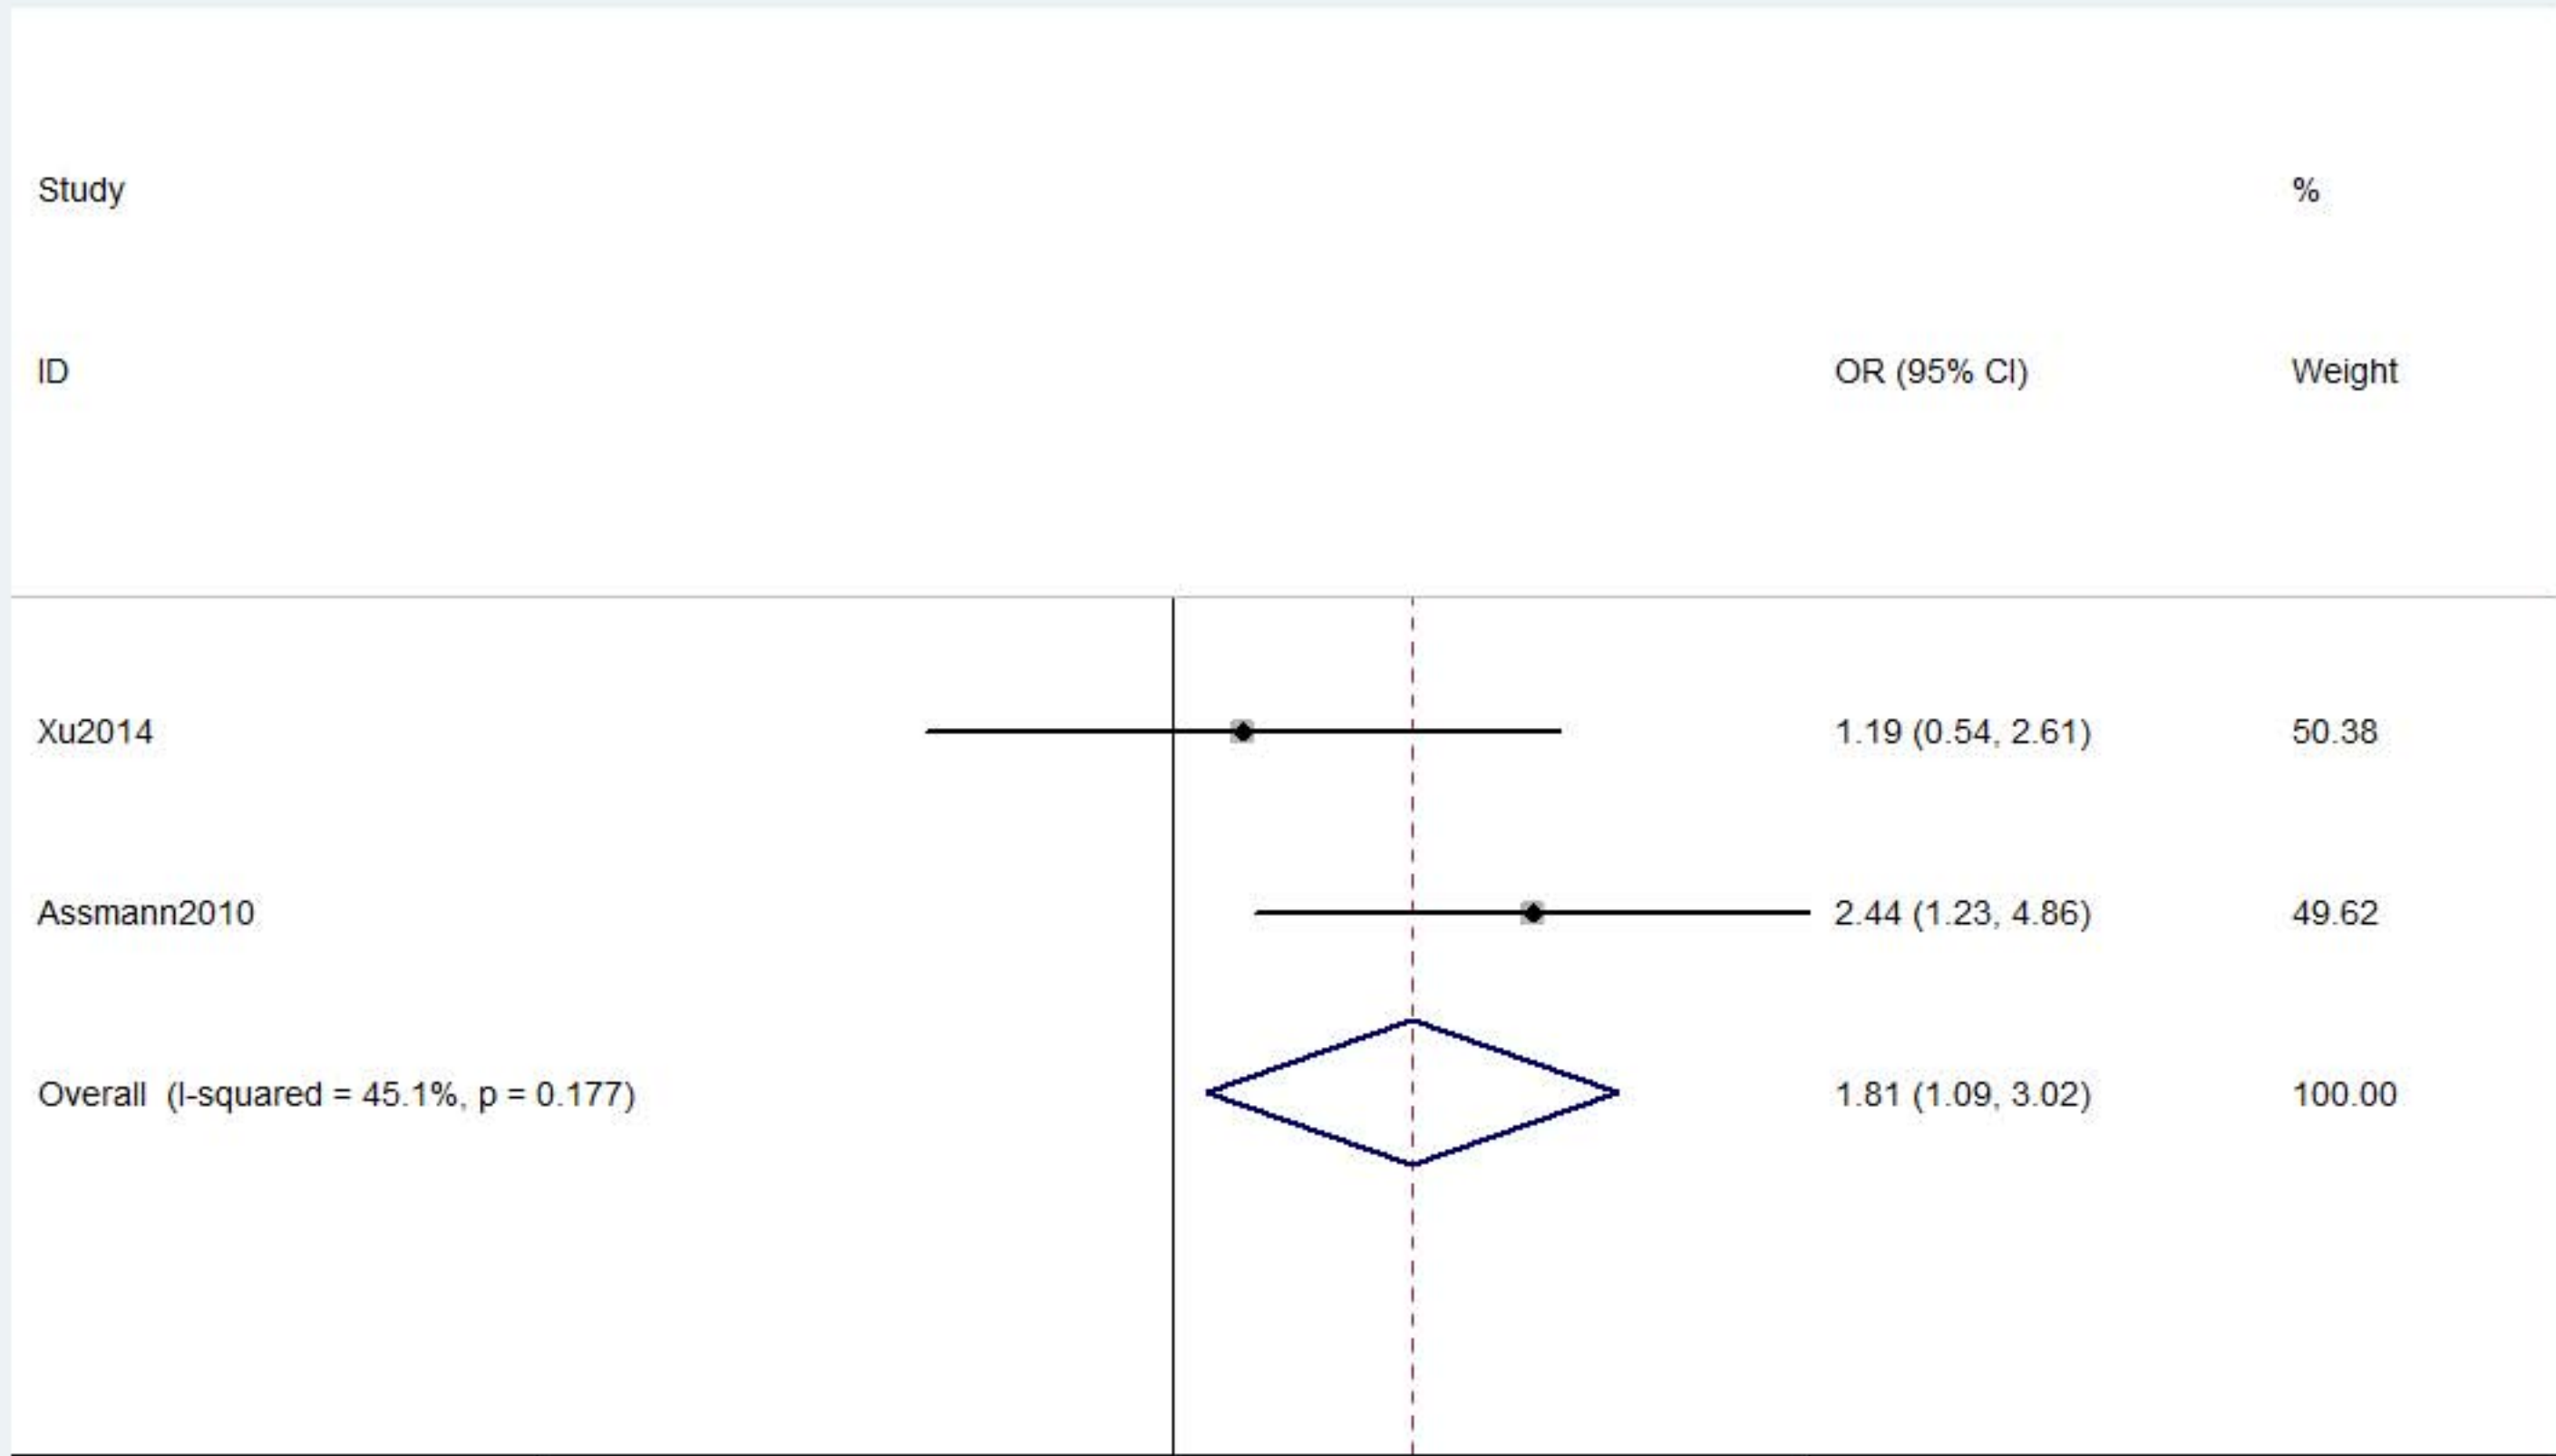

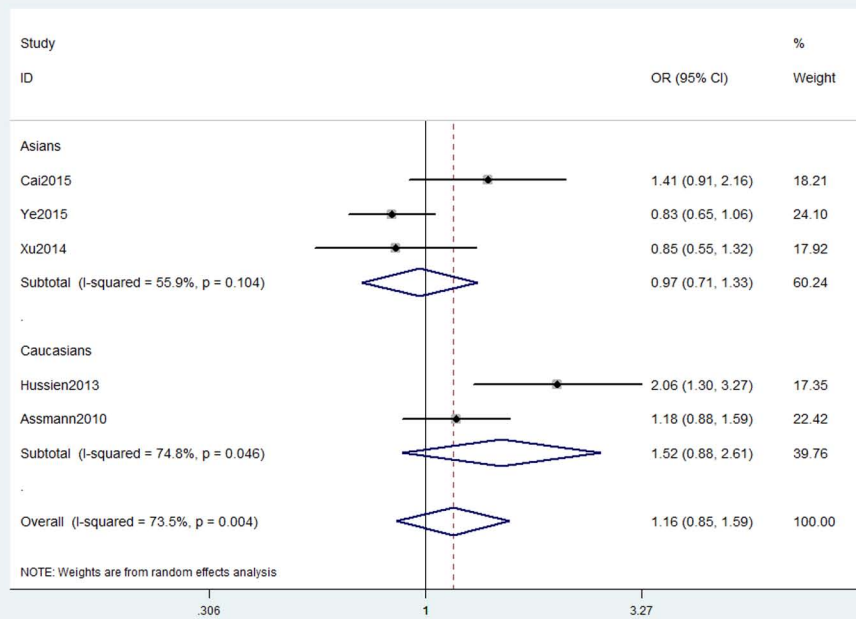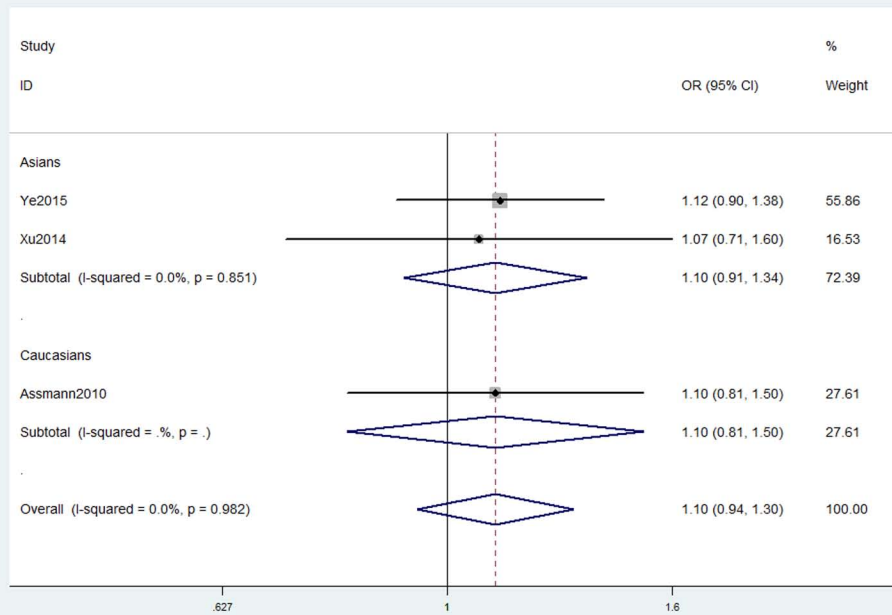

**Table S1** Stratified analyses between rs1805034 polymorphism and the risk of RA

| Variable | Genotype (case/control) |         |       | OR (95% CI); <i>P</i> * |                        |                        |                        |              |
|----------|-------------------------|---------|-------|-------------------------|------------------------|------------------------|------------------------|--------------|
|          | rs1805034               | TT      | TC    | CC                      | TC vs. TT              | CC vs. TT              | CC+TC vs. TT           | CC vs. TC+TT |
| Sex      |                         |         |       |                         |                        |                        |                        |              |
| Male     | 65/104                  | 72/75   | 9/19  | 1.54(0.98,2.40); 0.060  | 0.76(0.32,1.78); 0.524 | 1.38(0.90,2.12); 0.143 | 0.62(0.27,1.41); 0.254 |              |
| Female   | 201/282                 | 181/249 | 43/56 | 1.02(0.78,1.33); 0.884  | 1.08(0.70,1.67); 0.737 | 1.03(0.80,1.32); 0.814 | 1.07(0.70,1.62); 0.759 |              |
| Age      |                         |         |       |                         |                        |                        |                        |              |
| ≤55      | 129/178                 | 136/160 | 31/33 | 1.17(0.85,1.62); 0.332  | 1.30(0.76,2.22); 0.346 | 1.19(0.88,1.62); 0.258 | 1.20(0.72,2.01); 0.492 |              |
| >55      | 137/208                 | 117/164 | 21/42 | 1.08(0.79,1.49); 0.625  | 0.76(0.43,1.34); 0.340 | 1.02(0.75,1.38); 0.913 | 0.73(0.42,1.27); 0.265 |              |
| rs531564 | CC                      | CG      | GG    | GC vs. CC               | GG vs. CC              | GG+GC vs. CC           | GG vs. GC+CC           |              |

OR = odds ratio; 95%CI = 95% confidence interval. \*Significant *P* values if  $\leq 0.05$ .

Table S2 Comparison of studied data according to RANK genotypes in all RA cases.

| rs1805034        |                           | RA(n=573)         |           |                   |           | <i>P</i> |
|------------------|---------------------------|-------------------|-----------|-------------------|-----------|----------|
|                  |                           | TC+CC(n=305)      |           | TT(n=266)         |           |          |
| Age              | Years, Mean $\pm$ SD      | 54.02 $\pm$ 15.63 |           | 55.07 $\pm$ 14.47 |           | 0.407    |
| Sex              | Male/Female, (n, %)       | 73/224            | 23.9/76.1 | 65/201            | 24.4/75.6 | 0.969    |
| ESR              | mm/h, Mean $\pm$ SD       | 33.08 $\pm$ 24.66 |           | 34.35 $\pm$ 25.95 |           | 0.549    |
| RF               | Positive/Negative, (n, %) | 240/65            | 78.7/21.3 | 214/52            | 80.5/19.5 | 0.603    |
| anticcp          | Positive/Negative, (n, %) | 149/156           | 48.9/51.1 | 150/116           | 56.4/43.6 | 0.072    |
| CRP              | mg/L, Mean $\pm$ SD       | 27.29 $\pm$ 33.41 |           | 29.49 $\pm$ 40.49 |           | 0.477    |
| DAS28            | Mean $\pm$ SD             | 4.28 $\pm$ 1.53   |           | 4.31 $\pm$ 1.41   |           | 0.806    |
| Functional class | I+II/ III+IV, (n, %)      | 175/130           | 57.4/42.6 | 152/114           | 57.1/42.9 | 0.955    |

Table S3 Comparison of studied data according to RANK genotype in all RA cases.

| rs1805034        |                           | RA(n=573) |                   | TC+TT(n=519) |                   | P     |
|------------------|---------------------------|-----------|-------------------|--------------|-------------------|-------|
|                  |                           | CC(n=52)  |                   |              |                   |       |
| Age              | Years, Mean $\pm$ SD      |           | 51.56 $\pm$ 17.13 |              | 54.81 $\pm$ 14.86 | 0.139 |
| Sex              | Male/Female, (n, %)       | 9/43      | 17.3%/82.7%       | 137/382      | 26.4%/73.6%       | 0.152 |
| ESR              | mm/h, Mean $\pm$ SD       |           | 32.58 $\pm$ 27.58 |              | 33.78 $\pm$ 25.04 | 0.744 |
| RF               | Positive/Negative, (n, %) | 7/45      | 13.5%/86.5%       | 110/409      | 21.2%/78.8%       | 0.188 |
| anticcp          | Positive/Negative, (n, %) | 24/28     | 46.2%/53.8%       | 248/271      |                   | 0.822 |
| CRP              | mg/L, Mean $\pm$ SD       |           | 34.51 $\pm$ 42.11 |              | 27.69 $\pm$ 36.28 | 0.204 |
| DAS28            | Mean $\pm$ SD             |           | 4.10 $\pm$ 1.36   |              | 4.31 $\pm$ 1.49   | 0.317 |
| Functional class | I+II/ III+IV, (n, %)      | 30/22     | 57.7%/42.3%       | 297/222      | 57.2%/42.7%       | 0.948 |

Table S4 Comparison of studied data according to RANK genotypes in all RA cases.

| rs1805034        |                           | RA(n=573)     |             |               |             |               |             | <i>P</i> |
|------------------|---------------------------|---------------|-------------|---------------|-------------|---------------|-------------|----------|
|                  |                           | TT (n=266)    |             | TC (n=253)    |             | CC (n=52)     |             |          |
| Age              | Years, Mean ± SD          | 55.07 ± 14.47 |             | 54.53 ± 15.29 |             | 51.56 ± 17.13 |             | 0.128    |
| Sex              | Male/Female, (n, %)       | 65/201        | 24.4%/75.6% | 72/181        | 27.1%/72.9% | 9/43          | 17.3%/82.7% | 0.207    |
| ESR              | mm/h, Mean ± SD           | 34.35 ± 25.95 |             | 33.18 ± 24.08 |             | 32.58 ± 27.58 |             | 0.620    |
| RF               | Positive/Negative, (n, %) | 214/52        | 80.5%/19.5% | 195/58        | 77.1%/22.9% | 45/7          | 86.5%/13.5% | 0.267    |
| anticcp          | Positive/Negative, (n, %) | 150/116       | 56.4%/43.6% | 121/132       | 47.8%/52.2% | 28/24         | 53.8%/46.2% | 0.145    |
| CRP              | Mg/L, Mean ± SD           | 29.49 ± 40.49 |             | 25.80 ± 31.22 |             | 34.51 ± 42.11 |             | 0.130    |
| DAS28            | Mean ± SD                 | 4.31 ± 1.41   |             | 4.32 ± 1.56   |             | 4.10 ± 1.36   |             | 0.364    |
| Functional class | I+II/ III+IV, (n, %)      | 152/114       | 57.1%/42.9% | 145/108       | 57.3%/42.7% | 30/22         | 57.7%/42.3% | 0.997    |

**Table S5** The association of genetic risk score of rs1805034, rs531564 polymorphisms with risk of RA.

| Variable       | Case (n = 574) | Control (n = 804) | OR (95% CI)            | <i>P</i> value | Adjusted OR (95% CI)   | <i>P</i> value |
|----------------|----------------|-------------------|------------------------|----------------|------------------------|----------------|
|                | N (%)          | N (%)             |                        |                |                        |                |
| First (-1.5-0) | 126            | 241               | <b>0.67(0.50,0.88)</b> | 0.005          | <b>0.66(0.49,0.87)</b> | 0.004          |
| Second (0)     | 204            | 260               | 1                      | -              | 1.0                    | -              |
| Third (0-0.5)  | 241            | 270               | 1.14(0.88,1.46)        | 0.317          | 1.13(0.88,1.46)        | 0.344          |

The genotyping for rs1805034 and rs531564 was successful in: 571 cases and 771 controls

Adjusted for sex and age

\*Bold values are statistically significant ( $P < 0.05$ )



**Table S6.** Characteristics of included studies

| Author     | Year | Nationality  | Sample size (Female/Male) |              | Age (mean) |         | Study Gene | Study SNPs | Genotype method | NOS | HWE |
|------------|------|--------------|---------------------------|--------------|------------|---------|------------|------------|-----------------|-----|-----|
|            |      |              | case                      | control      | case       | control |            |            |                 |     |     |
| Mohamed    | 2016 | Egypt        | 172 (female)              | 176 (female) | 57.4       | 55.1    | RANK       | rs1805034  | PCR-RFLP        | 6   | N   |
|            |      |              |                           |              |            |         | RANKL      | rs9525641  | PCR-RFLP        | 6   | N   |
| Xu         | 2014 | China        | 201(171/30)               | 200(172/28)  | 51.9       | 53.5    | RANKL      | rs2277438  | LDR-PCR         | 6   | Y   |
|            |      |              |                           |              |            |         | OPG        | rs2073618  | LDR-PCR         | 6   | Y   |
|            |      |              |                           |              |            |         |            | rs3102735  | LDR-PCR         | 6   | Y   |
|            |      |              |                           |              |            |         |            | rs7984870  | MALDI-TOF MS    | 5   | Y   |
| Zhang      | 2013 | China        | 329 (274/82)              | 697(496/201) | 53.6       | 53.5    | RANKL      | rs7984870  | MALDI-TOF MS    | 5   | Y   |
| Assmann    | 2010 | Germany      | 534(392/142)              | 519(186/333) | 49.1       | 34.8    | RANK       | rs1805034  | TaqMan          | 5   | Y   |
|            |      |              |                           |              |            |         |            | rs35211496 | TaqMan          | 5   | Y   |
|            |      |              |                           |              |            |         | RANKL      | rs9533156  | TaqMan          | 5   | Y   |
|            |      |              |                           |              |            |         |            | rs2277438  | TaqMan          | 5   | Y   |
|            |      |              |                           |              |            |         |            | rs1054016  | TaqMan          | 5   | Y   |
|            |      |              |                           |              |            |         | OPG        | rs3102735  | TaqMan          | 5   | Y   |
|            |      |              |                           |              |            |         |            | rs2073618  | TaqMan          | 5   | Y   |
| Zavala     | 2015 | Mexico       | 81(female)                | 52(female)   | 49.9       | NA      | OPG        | rs2073617  | PCR-RFLP        | 5   | Y   |
|            |      |              |                           |              |            |         |            | rs3134070  | PCR-RFLP        | 5   | Y   |
|            |      |              |                           |              |            |         |            | rs3134069  | PCR-RFLP        | 5   | Y   |
| Cai        | 2015 | China        | 205(175/30)               | 171(97/74)   | 48.5       | 41.6    | OPG        | rs3102735  | PCR             | 6   | Y   |
|            |      |              |                           |              |            |         |            | rs3134069  | PCR             | 6   | Y   |
| Ye         | 2015 | China        | 574(427/147)              | 804(599/205) | 54.5       | 55.7    | OPG        | rs3102735  | MALDI-TOF MS    | 6   | Y   |
|            |      |              |                           |              |            |         |            | rs2073618  | MALDI-TOF MS    | 6   | Y   |
| Hussien    | 2013 | Saudi Arabia | 200(female)               | 150(female)  | 57.3       | 57.1    | OPG        | rs3102735  | PCR-RFLP        | 5   | Y   |
| This study | 2018 | China        | 574(427/147)              | 804(599/205) | 54.5       | 55.7    | RANK       | rs1805034  | MALDI-TOF MS    | 6   | Y   |

**Table S7.** Genotype distributions of RANK, RANKL, OPG polymorphisms in the included studies

NA, not available; HB, hospital-based; PB, population-based.

| Gene & SNP      | Author&Year    | SOC | Ethnicity  | Allele |   | CASE |     |     | CONTROL |     |     | Association with RA |
|-----------------|----------------|-----|------------|--------|---|------|-----|-----|---------|-----|-----|---------------------|
|                 |                |     |            | 1      | 2 | 11   | 12  | 22  | 11      | 12  | 22  |                     |
| RANK rs1805034  | Mohamed2016    | PB  | Caucasians | T      | C | 87   | 61  | 24  | 74      | 69  | 33  | Increased risk      |
|                 | Assmann2010    | HB  | Caucasians | T      | C | 154  | 235 | 132 | 148     | 264 | 104 | Not related         |
|                 | This study2018 | HB  | Chinese    | T      | C | 266  | 253 | 52  | 386     | 324 | 75  | Not related         |
| RANK rs35211496 | Assmann2010    | HB  | Caucasians | C      | T | 368  | 128 | 23  | 330     | 165 | 21  | Decreased risk      |
| RANKL rs2277438 | Xu2014         | PB  | Asians     | A      | G | 95   | 90  | 15  | 99      | 77  | 12  | Not related         |
|                 | Assmann2010    | HB  | Caucasians | A      | G | 342  | 136 | 28  | 360     | 140 | 12  | Increased risk      |
| RANKL rs7984870 | Zhang2013      | HB  | Chinese    | C      | G | 90   | 152 | 78  | 175     | 344 | 175 | Not related         |
| RANKL rs9525641 | Mohamed2016    | PB  | Caucasians | T      | C | 76   | 65  | 31  | 73      | 69  | 34  | Not related         |
| RANKL rs9533156 | Assmann2010    | HB  | Caucasians | T      | C | 165  | 248 | 101 | 142     | 249 | 123 | Not related         |
| RANKL rs1054016 | Assmann2010    | HB  | Caucasians | G      | T | 178  | 242 | 98  | 161     | 242 | 107 | Not related         |
| OPG rs3102735   | Cai2015        | HB  | Asians     | T      | C | 127  | 63  | 15  | 119     | 49  | 3   | Increased risk      |
|                 | Ye2015         | PB  | Asians     | T      | C | 418  | 142 | 12  | 546     | 220 | 22  | Not related         |
|                 | Xu2014         | PB  | Asians     | T      | C | 146  | 50  | 4   | 131     | 51  | 6   | Not related         |
|                 | Hussien2013    | PB  | Caucasians | T      | C | 116  | 59  | 25  | 111     | 36  | 3   | Increased           |
|                 | Assmann2010    | HB  | Caucasians | T      | C | 410  | 116 | 7   | 410     | 99  | 5   | Not related         |
| OPG rs2073618   | Ye2015         | PB  | Asians     | G      | C | 296  | 238 | 37  | 430     | 305 | 53  | Not related         |
|                 | Xu2014         | PB  | Asians     | G      | C | 107  | 77  | 16  | 102     | 70  | 13  | Not related         |
|                 | Assmann2010    | HB  | Caucasians | G      | C | 98   | 276 | 154 | 103     | 266 | 143 | Not related         |
| OPG rs3134069   | Zavala2015     | PB  | Caucasians | A      | C | 66   | 10  | 1   | 41      | 11  | 0   | Not related         |
|                 | Cai2015        | HB  | Asians     | A      | C | 177  | 27  | 1   | 144     | 25  | 2   | Not related         |
| OPG rs2073617   | Zavala2015     | PB  | Caucasians | C      | T | 28   | 26  | 11  | 9       | 29  | 13  | Increased risk      |
| OPG rs3134070   | Zavala2015     | PB  | Caucasians | C      | T | 52   | 18  | 2   | 39      | 11  | 2   | Not related         |
